# Supplementary material
Source: publisher site journal article supplement (https://www.spandidos-publications.com/5766/downloadSupplementary)

Figure S1. Stratification by multiple preoperative blood markers in patients with gastric cancer of Task 2. (A) Box plot showing the distribution of feature values for each stage. (B) The distribution of selected features was divided into two groups according to whether the patient survived 5 years without recurrence and is shown as box plots. (C) Survival analysis according to the median value of selected significant features. Alb, serum albumin; TP, total protein; CEA, carcinoembryonic antigen; CA, carbohydrate antigen; Hb, hemoglobin level; MCHC, mean corpuscular hemoglobin concentration; PT, prothrombin time; PCT, procalcitonin.

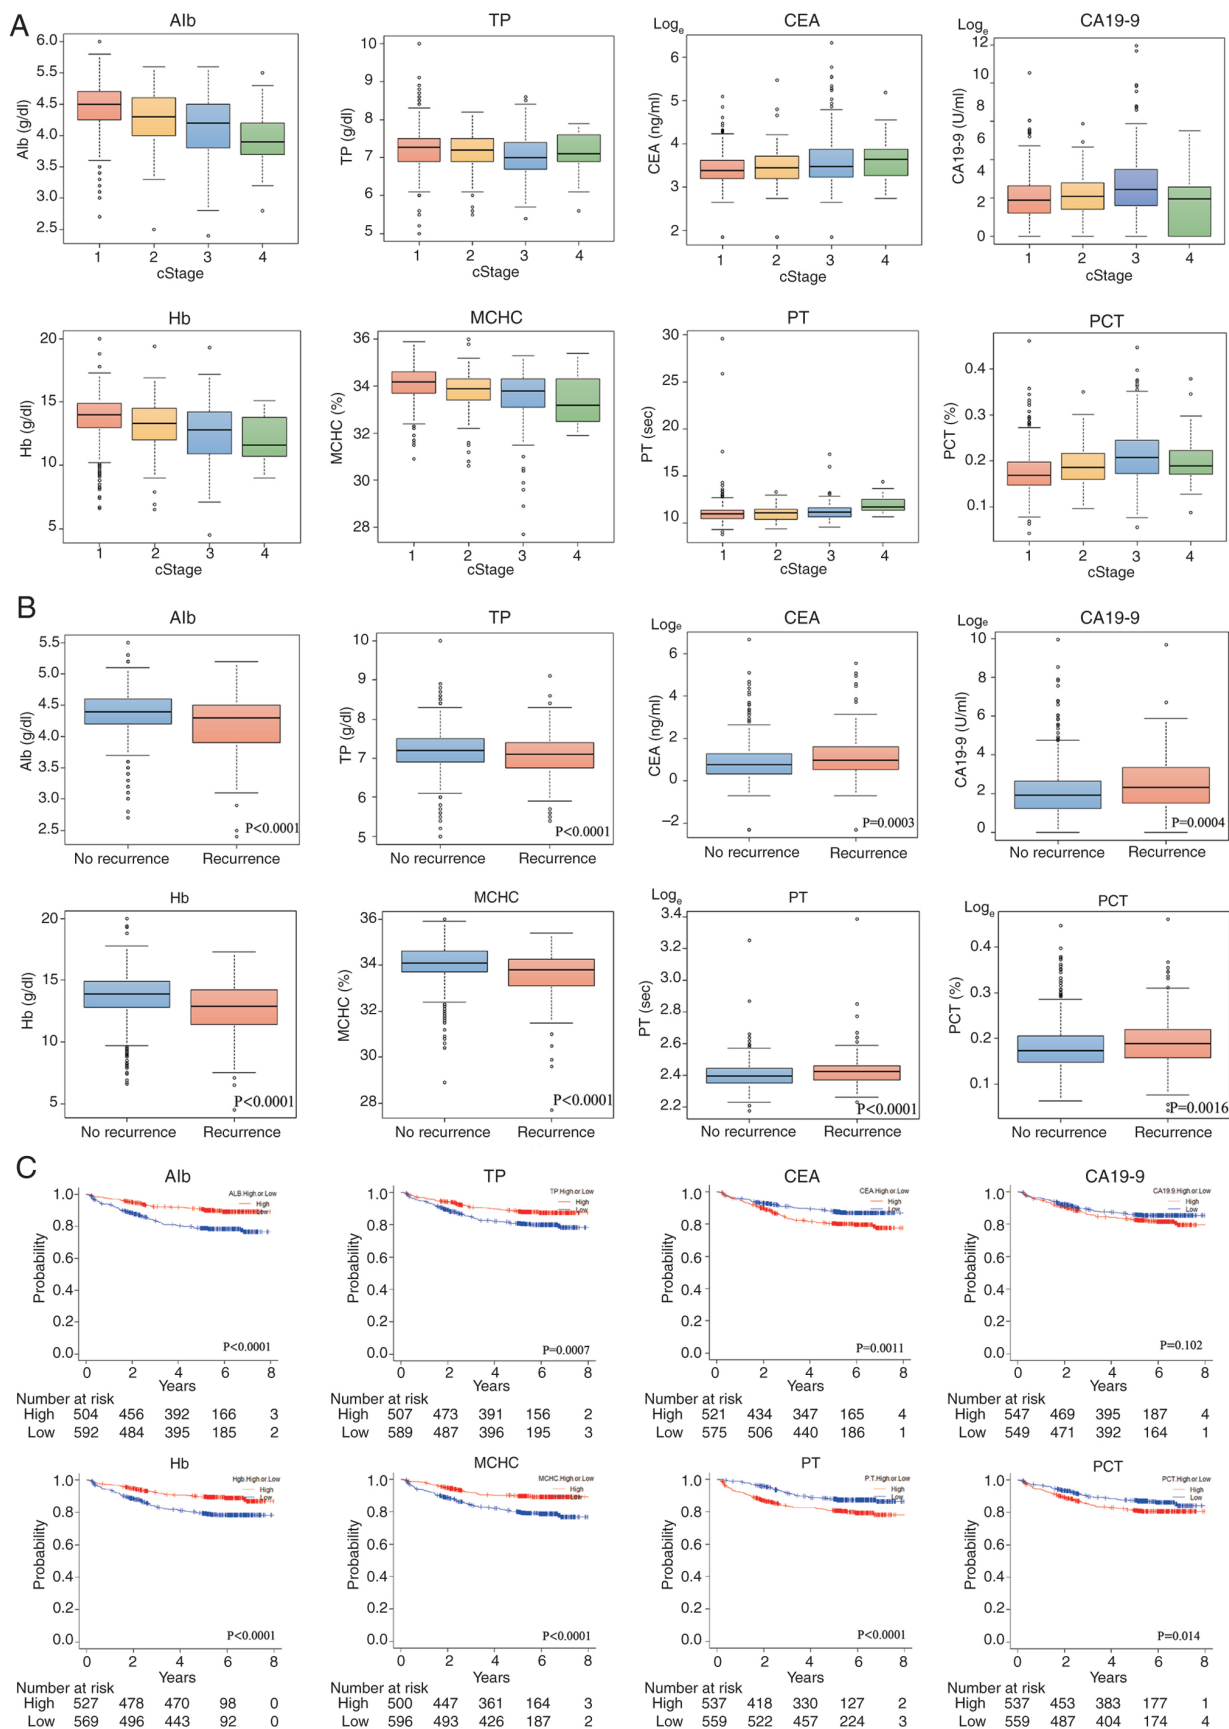

Figure S2. Clustering results of Task 2. Plotted on the grouping plane into three groups: Cluster 1 (red), Cluster 2 (green) and Cluster 3 (blue). Stages are represented by plot sizes: stage I is small, stage II + III is moderate and stage IV is largest. For the prognosis, O indicates no recurrence group and + indicates the recurrence group. Results are presented with four classifiers.

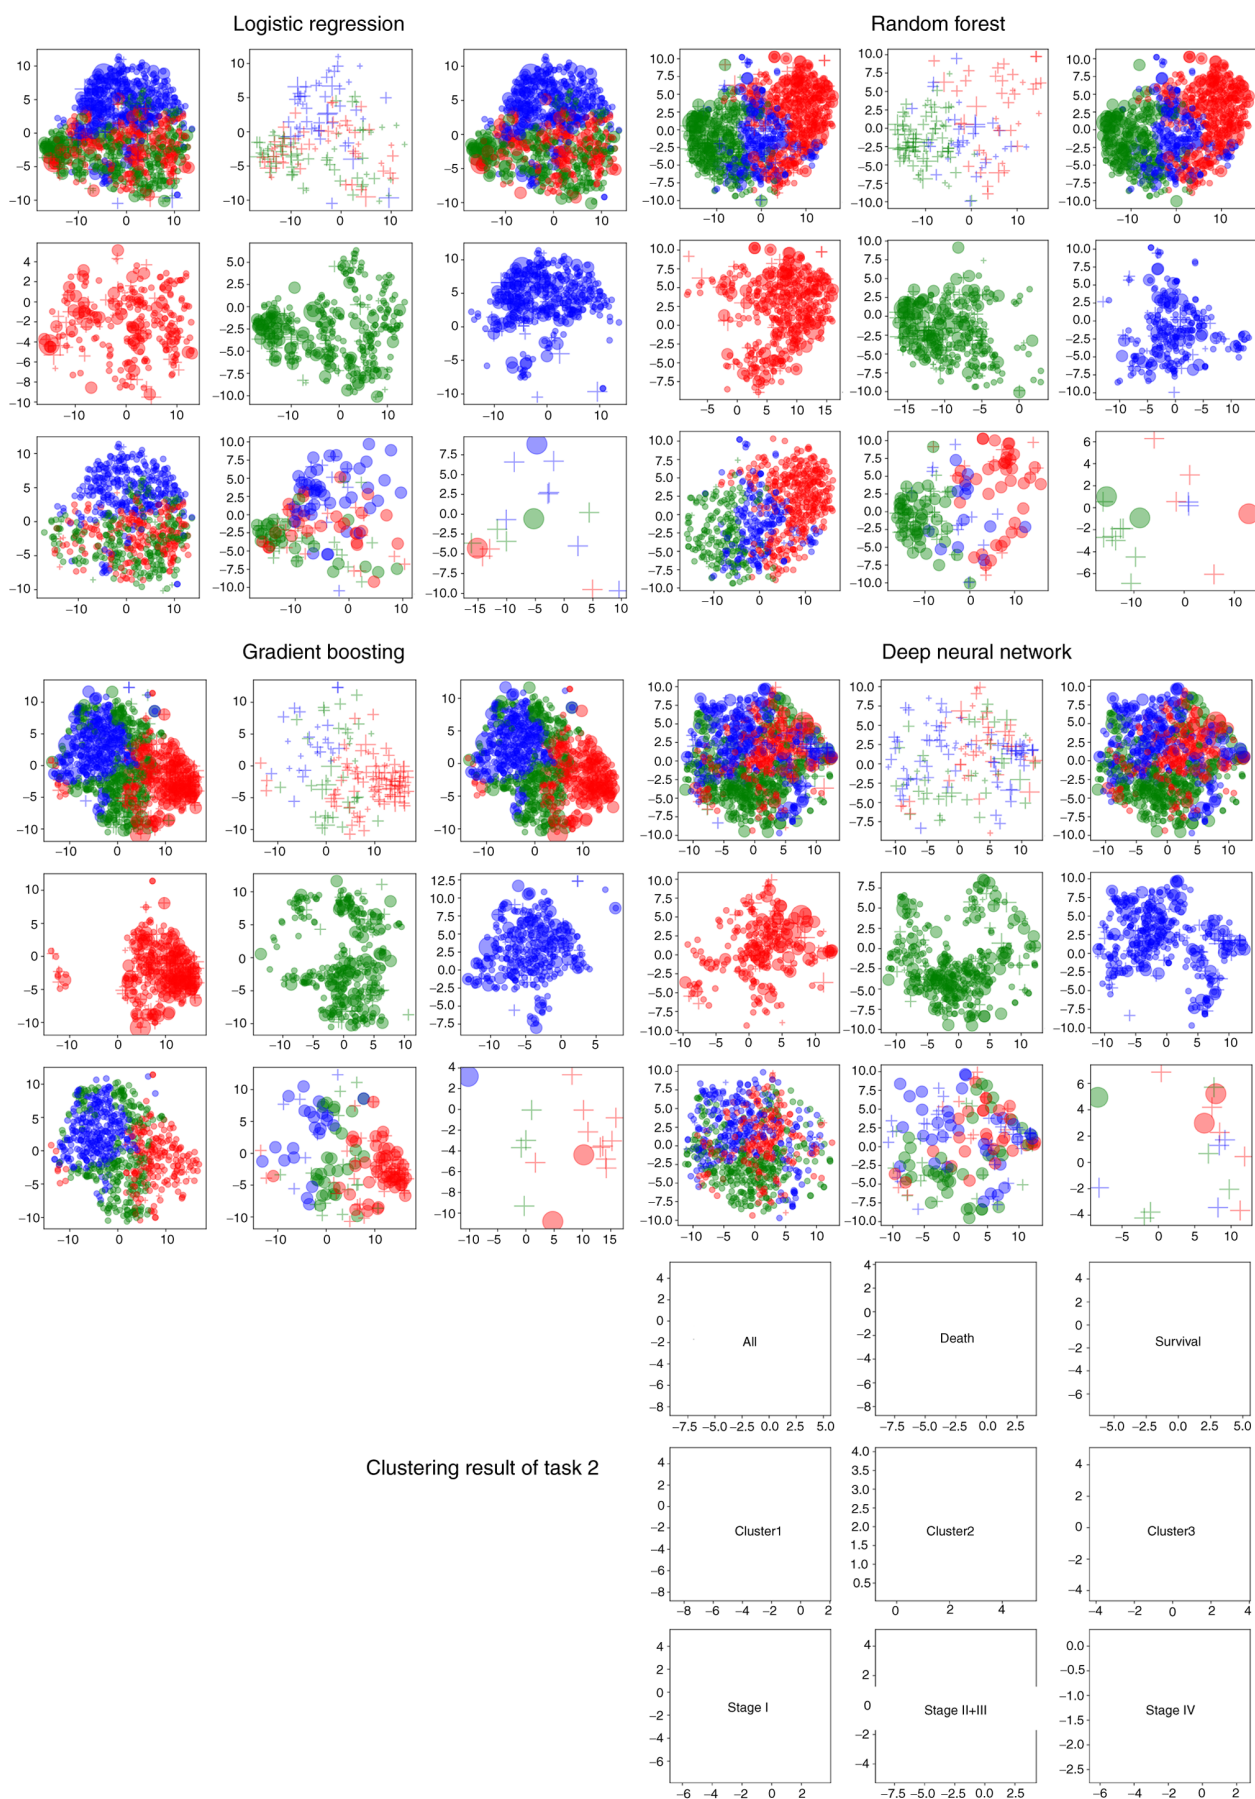

Figure S3. Survival analysis according to the median value of CI.

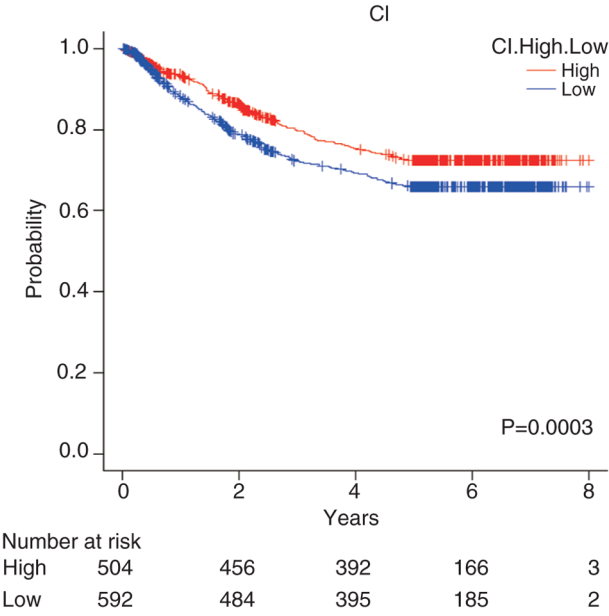

Supplement: Supplementary file 1 [file downloadSupplementary]
